# Supplementary material
Source: publisher site journal article supplement (http://www.kjim.org/upload/media/kjim-2020-180-suppl1.pdf)
Supplement: Supplementary file 1 [file kjim-2020-180-suppl1.pdf]

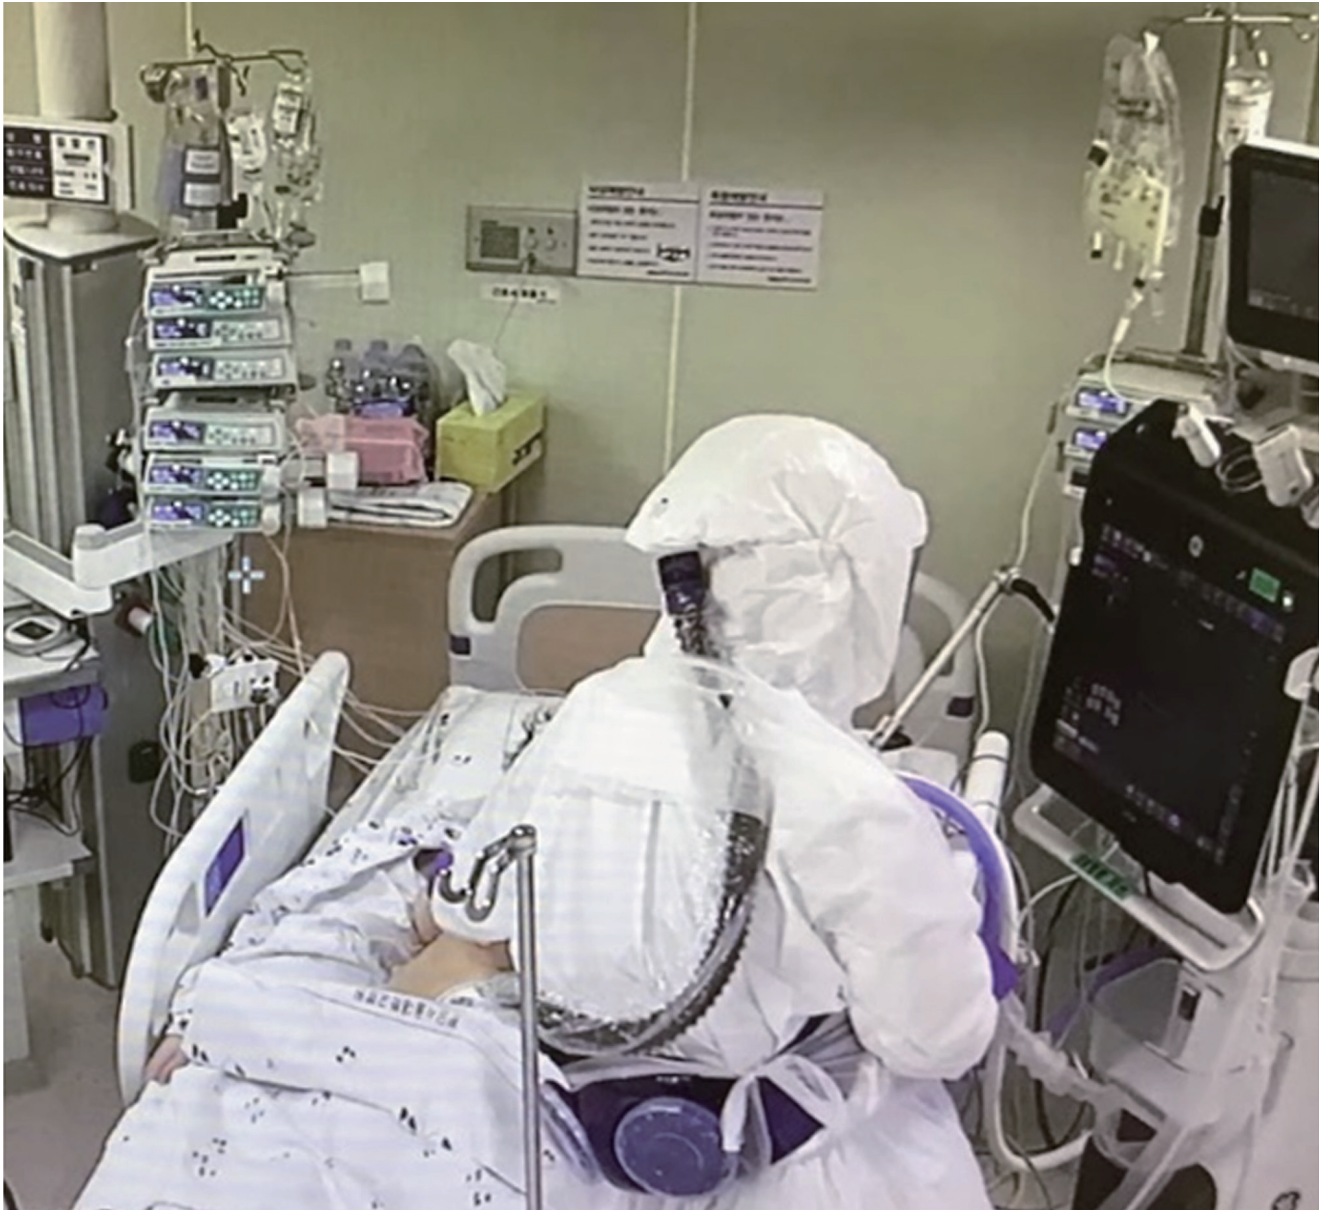

**Supplementary Figure 1.** Bedside lung ultrasound was done in an isolated, negative-pressure room for each patient by an independent physician with full personal protective equipment, including a powered air purifying respirator.
